# Supplementary material for: Gradient Micropillar Array Inspired by Tree Frog for Robust Adhesion on Dry and Wet Surfaces
Source: MDPI journal article supplement (doi:10.3390/biomimetics7040209), 2022-11-21
Supplement: s1 [file s1]

# Supplementary Information

## Gradient Micropillar Array Inspired by Tree Frog for Robust Adhesion on Dry and Wet Surfaces

Quan Liu <sup>1,2</sup>, Fandong Meng<sup>1</sup>, Di Tan <sup>3,\*</sup>, Zhekun Shi <sup>1</sup>, Bo Zhu <sup>1</sup>, Kangjian Xiao <sup>1</sup> and Longjian Xue <sup>1,\*</sup>

<sup>1</sup> School of Power and Mechanical Engineering, The Institute of Technological Science, Wuhan University, South Donghu Road 8, Wuhan 430072, China

<sup>2</sup> Institute of Special Polymer Research, Institute of Zhejiang University-Quzhou, 78 Jiu Hua Boulevard North, Quzhou 324000, China

<sup>3</sup> Institute of Textiles and Clothing, The Hong Kong Polytechnic University, Hung Hom, Kowloon, Hong Kong, China

\* Correspondence: di-itc.tan@polyu.edu.hk (D.T.); xuelongjian@whu.edu.cn (L.X.)

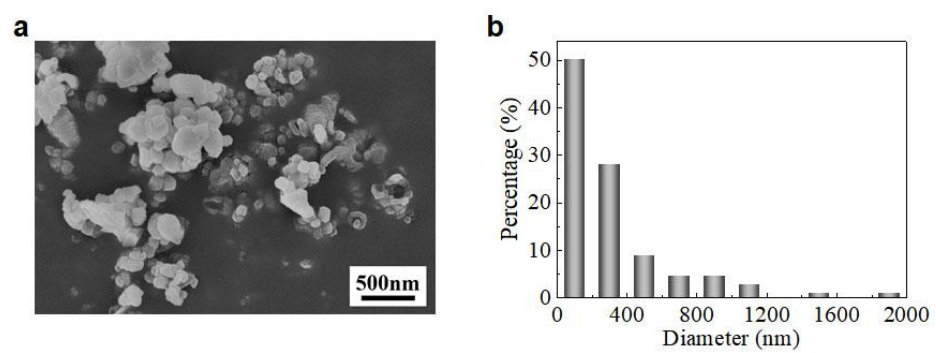

**Figure S1.** (a) SEM image of  $\text{CaCO}_3$  NPs. (b) The statistics of  $\text{CaCO}_3$  NPs' diameters.

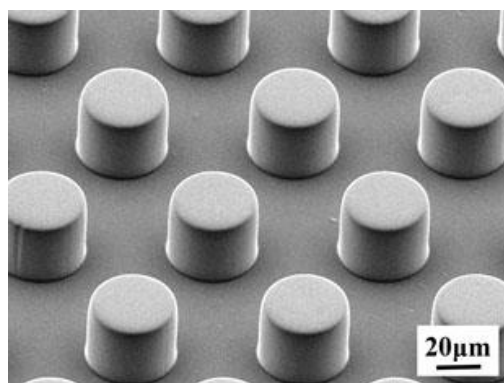

**Figure S2.** SEM image of GP array.

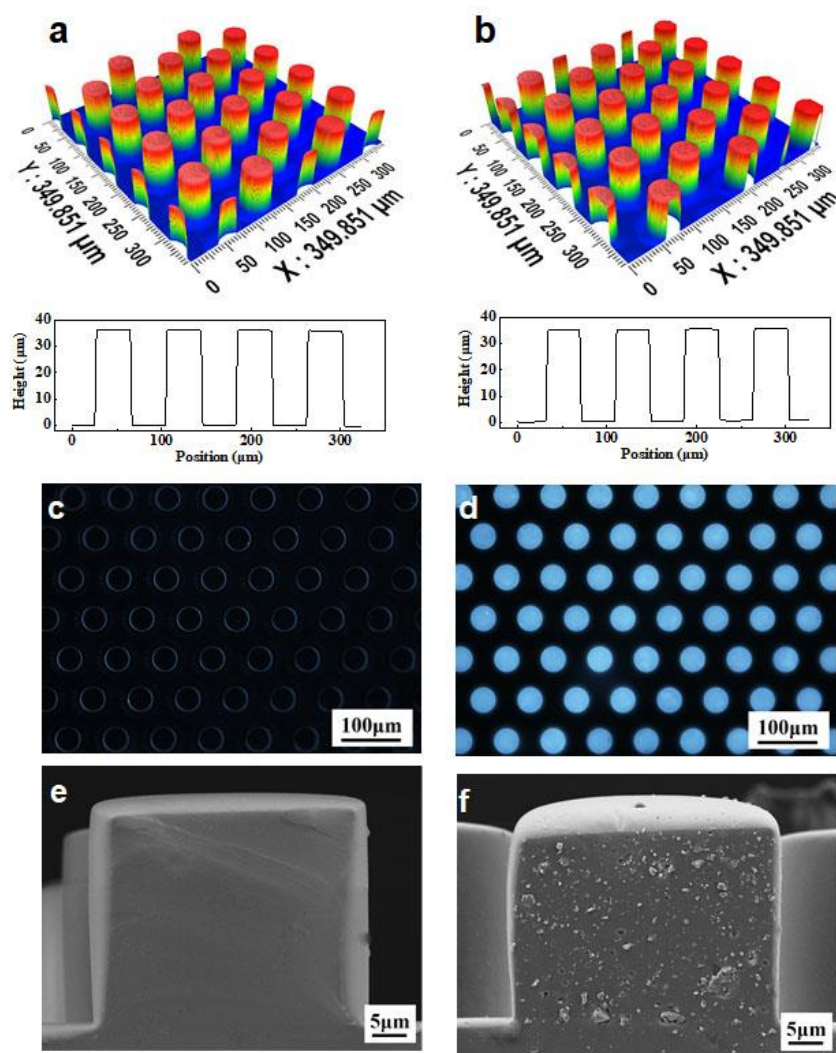

**Figure S3.** 3D images and height profile of (a) PP and (b) HP. Optical morphology of (c) PP and (d) GP. SEM images of cross sections of (e) PP and (f) HP.

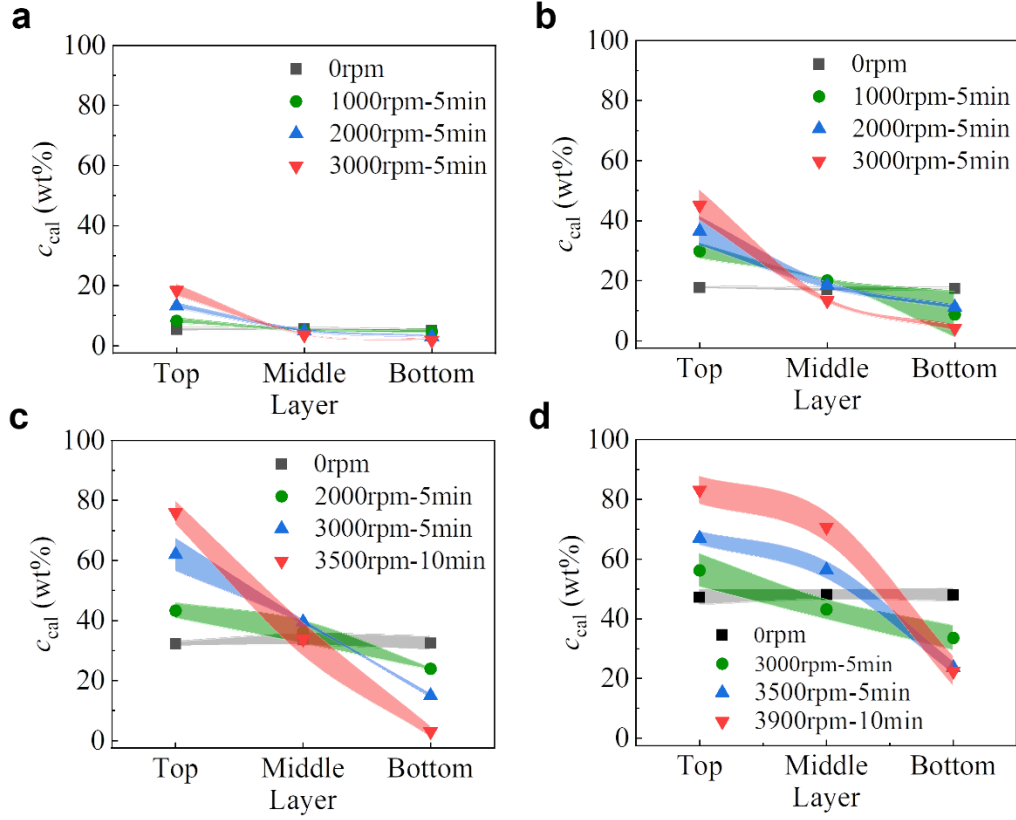

**Figure S4.** The  $c_{cal}$  in different layer of (a) GP<sub>10wt%</sub>, (b) GP<sub>30wt%</sub>, (c) GP<sub>50wt%</sub> and (d) GP<sub>70wt%</sub> under different centrifugal parameters.

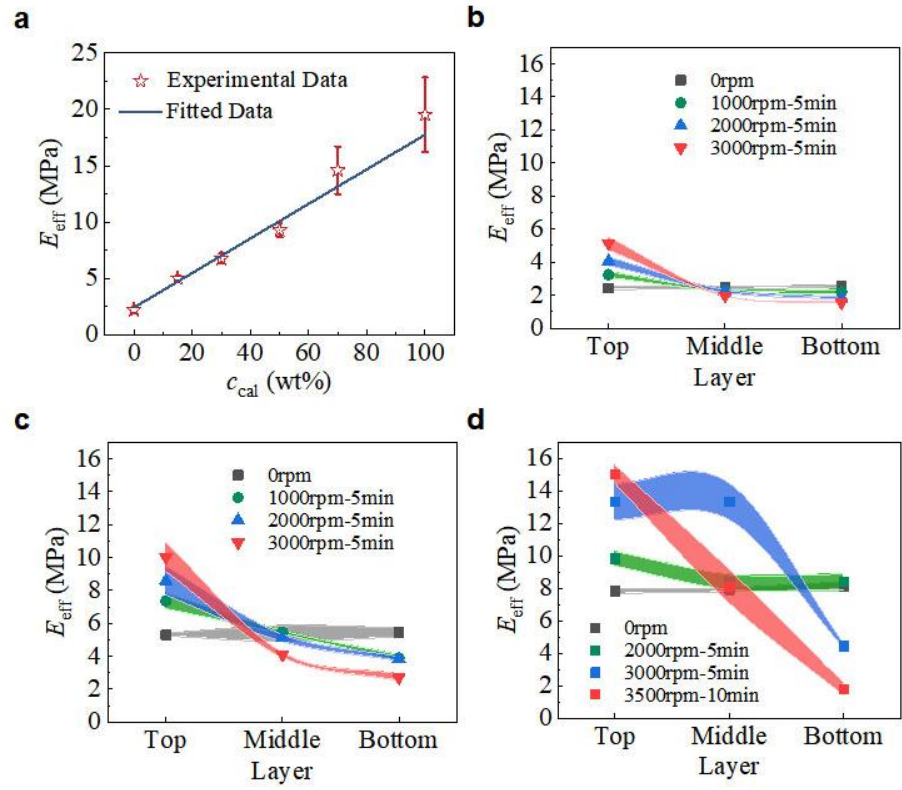

**Figure S5.** (a) The dependence of  $E_{eff}$  on  $c_{cal}$ .  $E_{eff}$  of each layer in (b) GP<sub>10wt%</sub>, (c) GP<sub>30wt%</sub> and (d) GP<sub>50wt%</sub> under different centrifugal parameters.

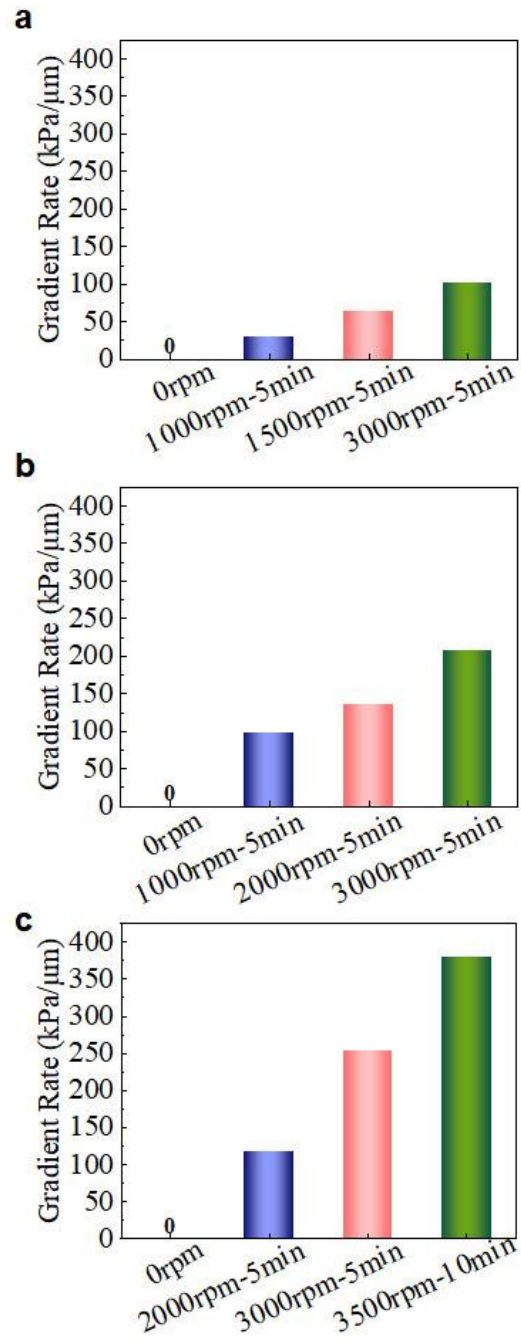

**Figure S6.** The gradient rate of (a) GP<sub>10wt%</sub>, (b) GP<sub>30wt%</sub> and (c) GP<sub>50wt%</sub> under different centrifugal parameters.

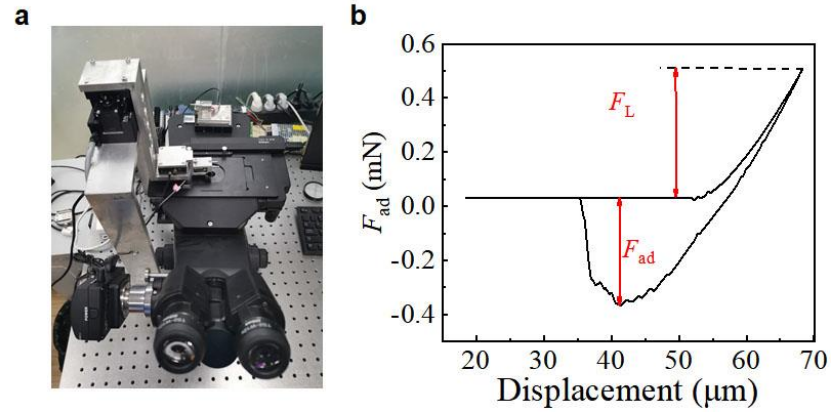

**Figure S7.** (a) Home-made device for microscopic adhesion test. (b) Representative force-displacement curve measured on micropillar arrays with loading force ( $F_L$ ) and pull off force (adhesion force,  $F_{ad}$ ) indicated.

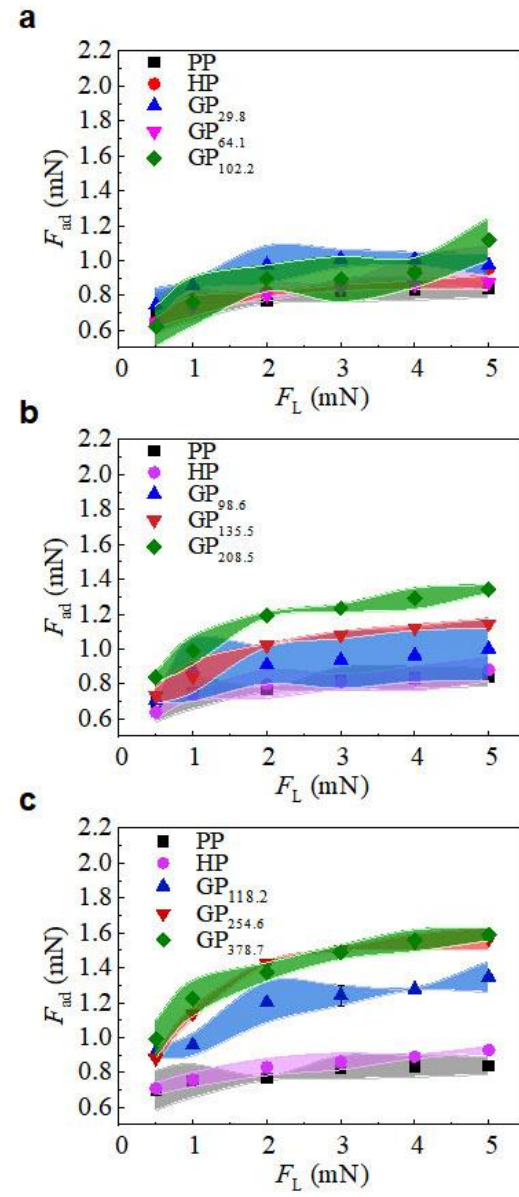

**Figure S8.** Dependence of  $F_{ad}$  of (a) GP<sub>10wt%</sub>, (b) GP<sub>30wt%</sub> and (c) GP<sub>50wt%</sub> on  $F_L$ .

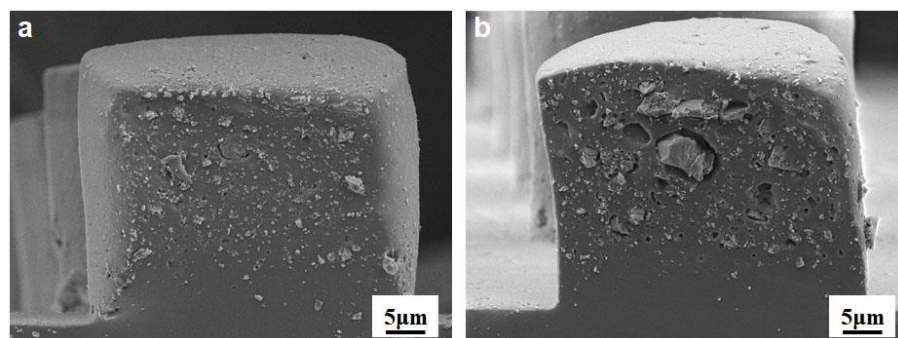

**Figure S9.** SEM images of the cross section of GP<sub>70wt%</sub> with gradient rate of (a) 214.6 kPa/μm and (b) 288.6 kPa/μm.

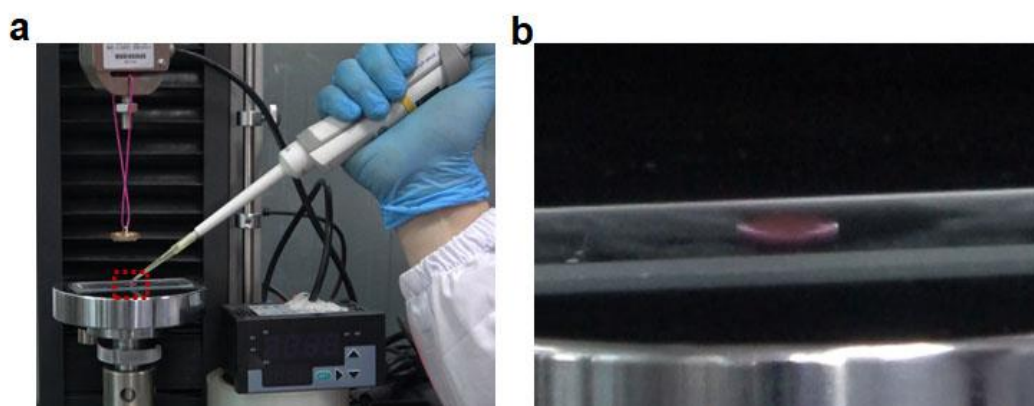

**Figure S10.** (a) Macroscopic wet adhesion test by using a universal testing machine. (b) Enlargement image of droplet water at the contact interface.

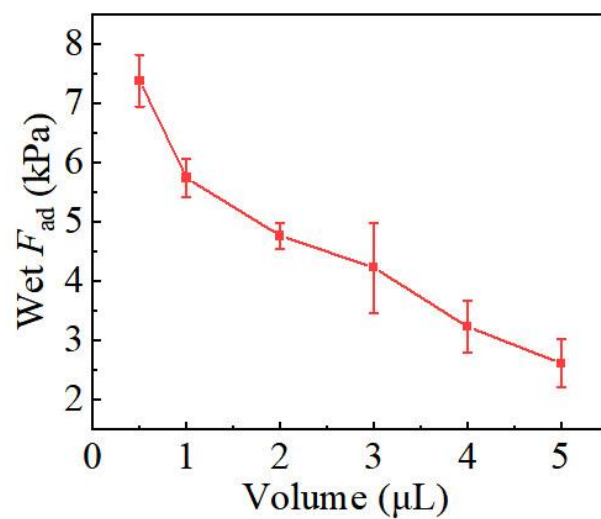

**Figure S11.** Wet  $F_{ad}$  of GP with different volume of water in the contact interface. .

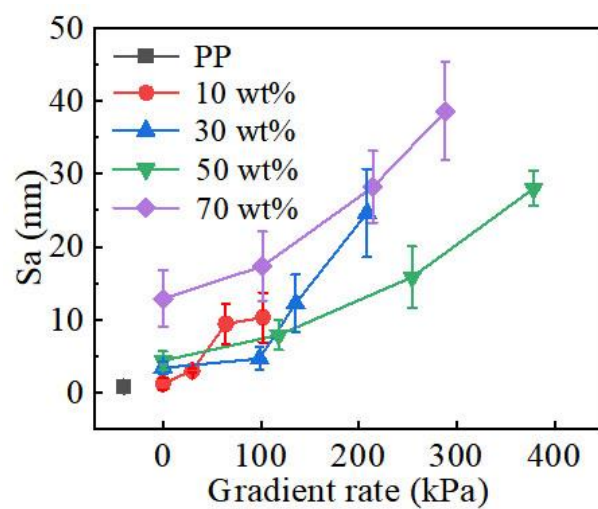

**Figure S12.** Sa of various micropillars.

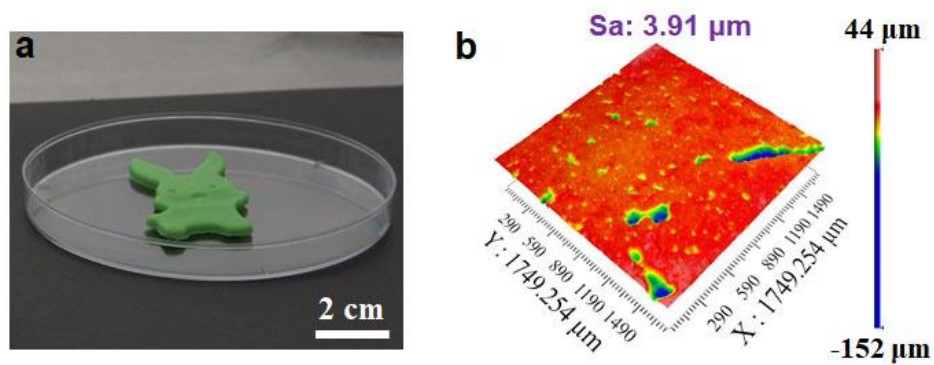

**Figure S13.** (a) A photograph image of soft plasticine toy and (b) the 3D image with Sa of 3.91 μm.
